# Supplementary material for: Food Safety Attitudes in College Students: A Structural Equation Modeling Analysis of a Conceptual Model
Source: Nutrients. 2013 Jan 30;5(2):328–39. doi: 10.3390/nu5020328 (PMC3635197; doi:10.3390/nu5020328)

# Lifestyle survey

For each of the following questions, please mark an ☐ in the one box or circle the number which best describes your answer.

## INFORMED CONSENT FORM

**TITLE:** Attitudes towards Food Safety in College Students

**PURPOSE OF THE STUDY:** To ascertain the attitude of college students in a Seventh-day Adventist university towards food safety.

**INCLUSION CRITERIA:** In order to participate, I recognize that I must be an Andrews University student who is 18 years old or older of sound mind that is currently enrolled in classes as of Fall 2011.

**RISKS AND DISCOMFORTS:** I have been informed that there are no physical or emotional risks to my involvement in this study.

**BENEFITS/RESULTS:** I accept that I will receive no remuneration for my participation, but that by participating, I will help the researcher to understand the attitudes towards food safety in a college aged population. I understand I will earn 25 extra points for participating in this study.

**VOLUNTARY PARTICIPATION:** I understand that my involvement in this survey is voluntary and that I may withdraw my participation at any time without any pressure, embarrassment, or negative impact on me. I also understand that my participation is confidential and will never be disclosed.

**CONTACT INFORMATION:** In the even that I have any questions or concerns with regard to my participation in this research project, I understand that I may contact the researcher, Rachelle Booth, at boothr@andrews.edu, or 269-471-8243 or Dr. Peter Pribis at pribis@andrews.edu or 269-471-3386.

☐ I agree with the Informed Consent Form

☐ I do not agree with the Informed Consent Form

# Census questions

What is your gender:

1 ☐ Male

2 ☐ Female

How old are you:

\_\_\_\_\_ (years)

What is your ethnicity:

- 1 ☐ White, non-Hispanic  
3 ☐ Black (African American)  
5 ☐ Hispanic  
7 ☐ Mixed racial background

- 2 ☐ Oriental  
4 ☐ American Indian  
6 ☐ Other

What is your marital status:

- 1 ☐ Never married  
3 ☐ Separated  
5 ☐ Widowed

- 2 ☐ First time married  
3 ☐ Divorced

What is your class standing:

- 1 ☐ Freshman  
3 ☐ Junior  
5 ☐ Graduate

- 2 ☐ Sophomore  
4 ☐ Senior

How many meals do you eat daily:

- 1 ☐ one  
3 ☐ three  
5 ☐ five

- 2 ☐ two  
4 ☐ four  
6 ☐ more than five

How many hours on average do you sleep every night?

\_\_\_\_\_ (hours)

How many days a week do you engage in aerobic physical activity at least 30 minutes or longer?

\_\_\_\_\_ (number of days)

How many days a week do you engage in muscle-strengthening physical activity?

\_\_\_\_\_ (number of days)

How many days a week do you engage in stretching physical activity?

\_\_\_\_\_ (number of days)

Are you a Seventh-day Adventist?

1 ☐ Yes

2 ☐ No

What is your height:

\_\_\_\_\_ (ft)

\_\_\_\_\_ (in)

What is your weight:

\_\_\_\_\_ (lb)

What lifestyle are you following:

- 1 ☐ **Non-vegetarian** (eat meat, dairy products, eggs, fish, vegetables, fruits, legumes, grains)  
2 ☐ **Pesco-vegetarian** (eat fish, vegetables, fruits, legumes, grains)  
3 ☐ **Lacto-ovo-vegetarian** (eat dairy products, eggs, vegetables, fruits, legumes, grains)  
3 ☐ **Vegan** (eat vegetables, fruits, legumes, grains)

How long are following this lifestyle?

..... (years)

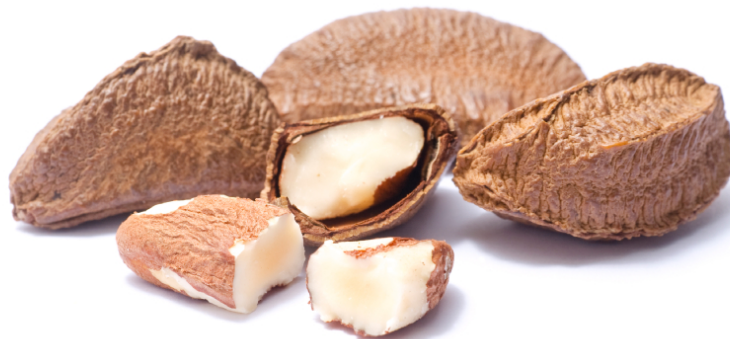

# Food Frequency Questionnaire

| Code                                                                    | 1                     | 2                   | 3                | 4                  | 5                  | 6               | 7                |
|-------------------------------------------------------------------------|-----------------------|---------------------|------------------|--------------------|--------------------|-----------------|------------------|
| Food                                                                    | Never<br>or<br>rarely | 1-3<br>per<br>month | 1<br>per<br>week | 2-4<br>per<br>week | 5-6<br>per<br>week | 1<br>per<br>day | 2+<br>per<br>day |
| Beef (hamburger, ground beef, meatballs, casserole, etc.)               |                       |                     |                  |                    |                    |                 |                  |
| Chicken or turkey (roasted, stewed, broiled, fried, in casserole, etc.) |                       |                     |                  |                    |                    |                 |                  |
| Pork (bacon, sausage, ham, chops, ribs)                                 |                       |                     |                  |                    |                    |                 |                  |
| Lamb (steak, roast, stew, sausage, salami, etc.)                        |                       |                     |                  |                    |                    |                 |                  |
| Fish (tuna, salmon, herring, trout, mackerel et.)                       |                       |                     |                  |                    |                    |                 |                  |
| Milk (whole, 2%, skim)                                                  |                       |                     |                  |                    |                    |                 |                  |
| Cheese (American, cheddar, mozzarella etc.)                             |                       |                     |                  |                    |                    |                 |                  |
| Yogurt (regular, low fat)                                               |                       |                     |                  |                    |                    |                 |                  |
| Sour cream (whole or low fat)                                           |                       |                     |                  |                    |                    |                 |                  |
| Egg (fried, boiled, scrambled, egg salad etc.)                          |                       |                     |                  |                    |                    |                 |                  |
| Fresh fruit (apples, bananas, pears, grapes, oranges, etc.)             |                       |                     |                  |                    |                    |                 |                  |
| Canned fruits (peaches, pineapple, pears, etc.)                         |                       |                     |                  |                    |                    |                 |                  |
| Dried fruits (dates, figs, raisins)                                     |                       |                     |                  |                    |                    |                 |                  |
| Salads (iceberg, romaine)                                               |                       |                     |                  |                    |                    |                 |                  |
| Raw vegetables (tomatoes, carrots, onions, etc.)                        |                       |                     |                  |                    |                    |                 |                  |
| Cooked vegetables (broccoli, cauliflower, peas, yams, etc.)             |                       |                     |                  |                    |                    |                 |                  |
| Legumes (lentils, beans, soybeans)                                      |                       |                     |                  |                    |                    |                 |                  |
| Regular bread or pasta (made from white flour)                          |                       |                     |                  |                    |                    |                 |                  |
| Whole grain bread or pasta                                              |                       |                     |                  |                    |                    |                 |                  |
| Whole grain cereals (granola, shredded wheat, etc.)                     |                       |                     |                  |                    |                    |                 |                  |
| Flax seeds (ground flax seed or flax seeds oil)                         |                       |                     |                  |                    |                    |                 |                  |
| Nuts (walnuts, almonds, peanuts, peanut butter, cashews etc.)           |                       |                     |                  |                    |                    |                 |                  |
| Drinking water (including sparkling)                                    |                       |                     |                  |                    |                    |                 |                  |
| Soft drinks and coffee (Coke, Pepsi, Mountain Dew etc.)                 |                       |                     |                  |                    |                    |                 |                  |
| Caffeine free beverages (decaf soft drinks, decaf coffee, etc.)         |                       |                     |                  |                    |                    |                 |                  |
| Juices (orange, grape, apple etc.)                                      |                       |                     |                  |                    |                    |                 |                  |
| Tofu (scrambled, silken, etc.)                                          |                       |                     |                  |                    |                    |                 |                  |
| Meat substitutes (Vegi-Franks, Fri-Chick, Veja Links, etc.)             |                       |                     |                  |                    |                    |                 |                  |
| Soy or rice drinks (Silk, Rice dream or homemade)                       |                       |                     |                  |                    |                    |                 |                  |
| Pizza (Pizza Hut, Dominos, etc.)                                        |                       |                     |                  |                    |                    |                 |                  |
| Fast food (hamburgers, burritos, fried chicken)                         |                       |                     |                  |                    |                    |                 |                  |

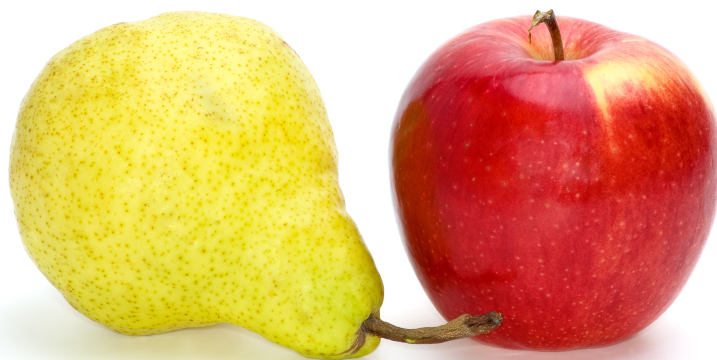

# Food Survey Questions

|    |                                                                                                                                            | Strongly<br>Disagree |   |   | Agree |   |   | Strongly<br>Agree |
|----|--------------------------------------------------------------------------------------------------------------------------------------------|----------------------|---|---|-------|---|---|-------------------|
| 1  | The food supply in the USA is generally safe                                                                                               | 1                    | 2 | 3 | 4     | 5 | 6 | 7                 |
| 2  | Eating produce treated with pesticides makes food dangerous to health                                                                      | 1                    | 2 | 3 | 4     | 5 | 6 | 7                 |
| 3  | Organic food is healthier because it is higher in minerals and vitamins.                                                                   | 1                    | 2 | 3 | 4     | 5 | 6 | 7                 |
| 4  | Organically farmed food is always healthier choice than food from traditional farming practices                                            | 1                    | 2 | 3 | 4     | 5 | 6 | 7                 |
| 5  | It is better to buy traditionally farmed produce that is flawless than organic produce that is not.                                        | 1                    | 2 | 3 | 4     | 5 | 6 | 7                 |
| 6  | Food additives are safe because the government regulates them                                                                              | 1                    | 2 | 3 | 4     | 5 | 6 | 7                 |
| 7  | Republicans try to suppress food safety regulations                                                                                        | 1                    | 2 | 3 | 4     | 5 | 6 | 7                 |
| 8  | Democrats tend to pass more legislation regarding the food industry than Republicans                                                       | 1                    | 2 | 3 | 4     | 5 | 6 | 7                 |
| 9  | The food supply is safer today than it was in the past                                                                                     | 1                    | 2 | 3 | 4     | 5 | 6 | 7                 |
| 10 | It is important to sanitize sponges and cutting boards with chlorine bleach solution                                                       | 1                    | 2 | 3 | 4     | 5 | 6 | 7                 |
| 11 | It is important to wash hands with hot water and soap before eating or working with food                                                   | 1                    | 2 | 3 | 4     | 5 | 6 | 7                 |
| 12 | Drinking unpasteurized milk is safe                                                                                                        | 1                    | 2 | 3 | 4     | 5 | 6 | 7                 |
| 13 | Buying dented cans is safe                                                                                                                 | 1                    | 2 | 3 | 4     | 5 | 6 | 7                 |
| 14 | Any food can be a vehicle for foodborne illness                                                                                            | 1                    | 2 | 3 | 4     | 5 | 6 | 7                 |
| 15 | Foodborne toxins are most likely to affect young children, pregnant women, and the elderly.                                                | 1                    | 2 | 3 | 4     | 5 | 6 | 7                 |
| 16 | Meat is more susceptible to food toxins than fruits and vegetables                                                                         | 1                    | 2 | 3 | 4     | 5 | 6 | 7                 |
| 17 | Each slaughterhouse controls the microbial contamination of the meat                                                                       | 1                    | 2 | 3 | 4     | 5 | 6 | 7                 |
| 18 | It is fine to eat food with mold as long as the mold has been cut off.                                                                     | 1                    | 2 | 3 | 4     | 5 | 6 | 7                 |
| 19 | Foodborne illnesses are increasing due to USDA deregulation                                                                                | 1                    | 2 | 3 | 4     | 5 | 6 | 7                 |
| 20 | Foodborne illnesses can be passed from person to person                                                                                    | 1                    | 2 | 3 | 4     | 5 | 6 | 7                 |
| 21 | The US needs more regulation regarding food safety                                                                                         | 1                    | 2 | 3 | 4     | 5 | 6 | 7                 |
| 22 | It is safe for inspectors at slaughterhouses rely solely on their sense of sight, smell, and touch to examine animals for signs of disease | 1                    | 2 | 3 | 4     | 5 | 6 | 7                 |
| 23 | All foods can be carriers for foodborne illness                                                                                            | 1                    | 2 | 3 | 4     | 5 | 6 | 7                 |
| 24 | Leaving leftovers out after a meal is safe, as long as the food is reheated before eating again                                            | 1                    | 2 | 3 | 4     | 5 | 6 | 7                 |
| 25 | Food poisoning only kills people who are already sick                                                                                      | 1                    | 2 | 3 | 4     | 5 | 6 | 7                 |
| 26 | As long as the pink color has been cooked out of the meat, it is safe to eat                                                               | 1                    | 2 | 3 | 4     | 5 | 6 | 7                 |
| 27 | Freezing food kills all the bacteria, making it safe to eat                                                                                | 1                    | 2 | 3 | 4     | 5 | 6 | 7                 |

## Food Review

|    | Code                                                                                       | 1 | 2 |
|----|--------------------------------------------------------------------------------------------|---|---|
| 1  | Eating a diet high in whole grains, legumes, fruits, and vegetables makes people healthier | T | F |
| 2  | Eating cans that are bulging with air is safe                                              | T | F |
| 3  | Oranges and lemons are a good source of vitamin C                                          | T | F |
| 4  | Eating junk food increases risk for chronic disease                                        | T | F |
| 5  | Vitamin E is called the sunshine vitamin                                                   | T | F |
| 6  | Vitamin B12 is produced by bacteria                                                        | T | F |
| 7  | A vegetarian lifestyle is the healthiest diet option                                       | T | F |
| 8  | It is impossible to get all nutrients from a vegan diet without supplementation            | T | F |
| 9  | Soluble fiber is able to lower cholesterol                                                 | T | F |
| 10 | The building block of proteins is fatty acids                                              | T | F |
| 11 | The sweetest type of sugar is glucose                                                      | T | F |
| 12 | Beef is usually contaminated with listeria                                                 | T | F |
| 13 | People need to eat meat because they cannot get enough protein from plant sources.         | T | F |
| 14 | Fruits and vegetables should be washed in cold running water before eating                 | T | F |
| 15 | Eating saturated fat increases cholesterol levels                                          | T | F |
| 16 | Meat should be heated to at least 160 degrees to kill foodborne pathogens.                 | T | F |
| 17 | The danger zone where bacteria multiples rapidly is between 41 and 140 degrees Fahrenheit  | T | F |
| 18 | Milk and dairy products are the only source of calcium and vitamin D                       | T | F |

**Thank you for participating in this survey**

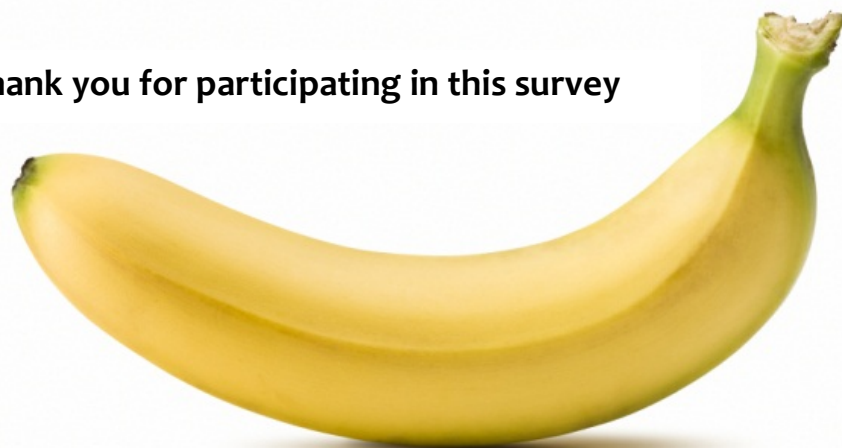

Supplement: Supplementary File 1 — Supplementary File (PDF, 785 KB) [file nutrients-05-00328-s001.pdf]
